# Supplementary material for: Large-scale analysis of antigenic diversity of T-cell epitopes in dengue virus
Source: Springer Nature journal article supplement (doi:10.1186/1471-2105-7-s5-s4), 2006-12-01
Supplement: 12859_2006_1354_MOESM1_ESM.pdf [file 12859_2006_1354_MOESM1_ESM.pdf]

**Table S1:** Errors and discrepancies found in each dengue serotype (DV1, DV2, DV3 and DV4) data entries collected from the NCBI Entrez protein database.

| DV1 entry | Error/discrepancy description                                                                                                                                                                                                                                                                                                                                                                                                                                                                                                                                                                                                                                                                                                                                                                               |
|-----------|-------------------------------------------------------------------------------------------------------------------------------------------------------------------------------------------------------------------------------------------------------------------------------------------------------------------------------------------------------------------------------------------------------------------------------------------------------------------------------------------------------------------------------------------------------------------------------------------------------------------------------------------------------------------------------------------------------------------------------------------------------------------------------------------------------------|
| AAK29447  | <ul style="list-style-type: none"> <li>• The position of the C terminal end of the protein NS4B is mis-annotated. Instead of 2293 it should be 2493. Evidence by sequence similarity to other strains.</li> <li>• The position of the N-terminal of the protein NS5 is mis-annotated. Instead of 2294 it should be 2494. Evidence by sequence similarity to other strains.</li> </ul>                                                                                                                                                                                                                                                                                                                                                                                                                       |
| A42551    | <ul style="list-style-type: none"> <li>• The C-terminal position of the precursor membrane protein region has been mis-annotated. It should be 205..280 instead of 205..281. Evidence by sequence similarity to other strains.</li> <li>• The N-terminal position of the envelope protein region has been mis-annotated. It should be 281..774 instead of 282..774. Evidence by sequence similarity to other strains.</li> <li>• The C-terminal position of the NS1 protein region has been mis-annotated. It should be 775..1126 instead of 775..1127. Evidence by sequence similarity to other strains.</li> <li>• The N-terminal position of the NS2a protein region has been mis-annotated. It should be 1127..1344 instead of 1128..1344. Evidence by sequence similarity to other strains.</li> </ul> |
| P33478    | <ul style="list-style-type: none"> <li>• The C-terminal position of the NS1 protein region has been mis-annotated. It should be 775..1126 instead of 775..1127. Evidence for this can be found in Fu <i>et al.</i>, (1992).</li> <li>• The N-terminal position of the NS2a protein region has been mis-annotated. It should be 1127..1344 instead of 1128..1344. Evidence for this can be found in Fu <i>et al.</i>, (1992).</li> </ul>                                                                                                                                                                                                                                                                                                                                                                     |
| AAN03445  | <ul style="list-style-type: none"> <li>• Under the field “Features”, we see the following statement:<br/> Protein 1..3392<br/> /product="envelope glycoprotein"<br/> The statement is not correct because envelope glycoprotein is only a part of the whole polyprotein. Instead of envelope glycoprotein it should have been “polyprotein” as in entry AAO47361 (GI:34596500)</li> </ul>                                                                                                                                                                                                                                                                                                                                                                                                                   |
| AAB70694  | <ul style="list-style-type: none"> <li>• The N-terminal position of the capsid protein region has been mis-annotated. It should be 1..114 instead of 2..114. Evidence by sequence similarity to other strains.</li> </ul>                                                                                                                                                                                                                                                                                                                                                                                                                                                                                                                                                                                   |
| AAB70696  | <ul style="list-style-type: none"> <li>• The N-terminal position of the capsid protein region has been mis-annotated. It should be 1..114 instead of 2..114. Evidence by sequence similarity to other strains.</li> <li>• The C-terminal position of the precursor membrane protein region has been mis-annotated. It should be 115..280 instead of 115..278. Evidence by sequence similarity to other strains.</li> <li>• The C-terminal position of the mature membrane protein region has been mis-annotated. It should be 206..280 instead of 206..278. Evidence by sequence similarity to other strains.</li> <li>• The N-terminal position of the envelope protein region has been mis-annotated. It should be 281..775 instead of 279..775.</li> </ul>                                               |

|                                   |                                                                                                                                                                                                                                                                                                                                                                                                                                                                                                                                                                                                                                                                                                                                                                                                                                                                                                                                                                              |
|-----------------------------------|------------------------------------------------------------------------------------------------------------------------------------------------------------------------------------------------------------------------------------------------------------------------------------------------------------------------------------------------------------------------------------------------------------------------------------------------------------------------------------------------------------------------------------------------------------------------------------------------------------------------------------------------------------------------------------------------------------------------------------------------------------------------------------------------------------------------------------------------------------------------------------------------------------------------------------------------------------------------------|
|                                   | Evidence by sequence similarity to other strains.                                                                                                                                                                                                                                                                                                                                                                                                                                                                                                                                                                                                                                                                                                                                                                                                                                                                                                                            |
| AAB70695                          | <ul style="list-style-type: none"> <li>• The N-terminal position of the capsid protein region has been mis-annotated. It should be 1..114 instead of 2..114. Evidence by sequence similarity to other strains.</li> <li>• The C-terminal position of the precursor membrane protein region has been mis-annotated. It should be 115..280 instead of 115..278. Evidence by sequence similarity to other strains.</li> <li>• The C-terminal position of the mature membrane protein region has been mis-annotated. It should be 206..280 instead of 206..278. Evidence by sequence similarity to other strains.</li> <li>• The N-terminal position of envelope protein region has been mis-annotated. It should be 281..775 instead of 279..775. Evidence by sequence similarity to other strains.</li> </ul>                                                                                                                                                                  |
| <b>DV2 entry</b>                  | <b>Error/discrepancy description</b>                                                                                                                                                                                                                                                                                                                                                                                                                                                                                                                                                                                                                                                                                                                                                                                                                                                                                                                                         |
| AAL00888                          | <ul style="list-style-type: none"> <li>• The position of the C-terminal of the capsid protein is mis-annotated. It should be 1..114 instead of 1..150. Evidence by sequence similarity to other strains.</li> <li>• The position of the N-terminal of the precursor membrane protein is mis-annotated. It should be 115..280 instead of 151..280. Evidence by sequence similarity to other strains.</li> </ul>                                                                                                                                                                                                                                                                                                                                                                                                                                                                                                                                                               |
| CAD31751                          | <ul style="list-style-type: none"> <li>• The protein 115..280 should be annotated as prM protein instead of envelope protein.</li> <li>• The protein 281..774 should be annotated as envelope protein instead of prM protein.</li> <li>• The position of the C-terminal of the envelope protein is mis-annotated. It should be 281..775 instead of 281..774. Evidence by sequence similarity to other strains.</li> <li>• The position of the N-terminal of the NS1 protein is mis-annotated. It should be 776..1127 instead of 775..1127. Evidence by sequence similarity to other strains.</li> <li>• The position of the C-terminal of the envelope protein is mis-annotated. It should be 1346..1475 instead of 1346..1474. Evidence by sequence similarity to other strains.</li> <li>• The position of the N-terminal of the NS3 protein is mis-annotated. It should be 1476..2093 instead of 1475..2093. Evidence by sequence similarity to other strains.</li> </ul> |
| AAA42941                          | <ul style="list-style-type: none"> <li>• The N-terminal position of the capsid protein region has been mis-annotated. It should be 1..114 instead of 2..114. Evidence by sequence similarity to other strains.</li> <li>• The position of the C-terminal of the NS4a protein is mis-annotated. It should be 2094..2243 instead of 2094..2379. Evidence by sequence similarity to other strains.</li> <li>• The position of the N-terminal of the NS4b protein is mis-annotated. It should be 2244..2491 instead of 2380..2491. Evidence by sequence similarity to other strains.</li> </ul>                                                                                                                                                                                                                                                                                                                                                                                  |
| <b>DV3 entry</b>                  | <b>Error/discrepancy description</b>                                                                                                                                                                                                                                                                                                                                                                                                                                                                                                                                                                                                                                                                                                                                                                                                                                                                                                                                         |
| P27915,<br>AAA99437 and<br>GNWVD3 | <ul style="list-style-type: none"> <li>• All the three entries have NS1/NS2a and NS4a/NS4b junctions mis-annotated; the amino acid sequence at these junctions in the three entries were not similar to those</li> </ul>                                                                                                                                                                                                                                                                                                                                                                                                                                                                                                                                                                                                                                                                                                                                                     |

|                  |                                                                                                                                                                                                                                                                                                                                                                                                                                                                                                                                                                                                                                                                                                                                                                                                                                                                                                                                                                                                                                                                                                                                                                                                                                                                                                                                                                                                                                                                                                                                                                                   |
|------------------|-----------------------------------------------------------------------------------------------------------------------------------------------------------------------------------------------------------------------------------------------------------------------------------------------------------------------------------------------------------------------------------------------------------------------------------------------------------------------------------------------------------------------------------------------------------------------------------------------------------------------------------------------------------------------------------------------------------------------------------------------------------------------------------------------------------------------------------------------------------------------------------------------------------------------------------------------------------------------------------------------------------------------------------------------------------------------------------------------------------------------------------------------------------------------------------------------------------------------------------------------------------------------------------------------------------------------------------------------------------------------------------------------------------------------------------------------------------------------------------------------------------------------------------------------------------------------------------|
|                  | described in Osatomi <i>et al.</i> (1990).                                                                                                                                                                                                                                                                                                                                                                                                                                                                                                                                                                                                                                                                                                                                                                                                                                                                                                                                                                                                                                                                                                                                                                                                                                                                                                                                                                                                                                                                                                                                        |
| <b>DV4 entry</b> | <b>Error/discrepancy description</b>                                                                                                                                                                                                                                                                                                                                                                                                                                                                                                                                                                                                                                                                                                                                                                                                                                                                                                                                                                                                                                                                                                                                                                                                                                                                                                                                                                                                                                                                                                                                              |
| AAB28474         | <ul style="list-style-type: none"> <li>• The position of the C-terminal of the capsid protein is mis-annotated. It should be 1..113 instead of 1..110. Evidence by sequence similarity to other strains.</li> <li>• The position of the N-terminal of the precursor membrane protein is mis-annotated. It should be 114..279 instead of 112..279. Evidence by sequence similarity to other strains.</li> </ul>                                                                                                                                                                                                                                                                                                                                                                                                                                                                                                                                                                                                                                                                                                                                                                                                                                                                                                                                                                                                                                                                                                                                                                    |
| AAA42964         | <ul style="list-style-type: none"> <li>• The position of the C-terminal of the envelope protein is mis-annotated. It should be 280..774 instead of 280..733. Evidence by sequence similarity to other strains.</li> <li>• The position of both the N and C termini of the NS1 protein is mis-annotated. It should be 775..1126 instead of 734..1184. Evidence by sequence similarity to other strains.</li> <li>• The position of both the N and C termini of the NS2a protein is mis-annotated. It should be 1127..1344 instead of 1185..1343. Evidence by sequence similarity to other strains.</li> <li>• The position of both the N and C termini of the NS2b protein is mis-annotated. It should be 1345..1474 instead of 1344..1473. Evidence by sequence similarity to other strains.</li> <li>• The position of both the N and C termini of the NS3 protein is mis-annotated. It should be 1475..2092 instead of 1474..2091. Evidence by sequence similarity to other strains.</li> <li>• The position of both the N and C termini of the NS4a protein is mis-annotated. It should be 2093..2242 instead of 2092..2374. Evidence by sequence similarity to other strains.</li> <li>• The position of both the N and C termini of the NS4b protein is mis-annotated. It should be 2243..2487 instead of 2092..2374. Evidence by sequence similarity to other strains.</li> <li>• The position of both the N and C termini of the NS5 protein is mis-annotated. It should be 2488..3387 instead of 2487..3386. Evidence by sequence similarity to other strains.</li> </ul> |
| P09866           | <ul style="list-style-type: none"> <li>• The position of the C-terminus of the NS1 protein is mis-annotated. It should be 775..1126 instead of 775..1185. Evidence by sequence similarity to other strains.</li> <li>• The position of the N-terminus of the NS2a protein is mis-annotated. It should be 1127..1344 instead of 1186..1344. Evidence by sequence similarity to other strains.</li> <li>• The position of the C-terminus of the NS4a protein is mis-annotated. It should be 2093..2242 instead of 2093..2375. Evidence by sequence similarity to other strains.</li> <li>• The position of the N-terminus of the NS4b protein is mis-annotated. It should be 2243..2487 instead of 2376..2487. Evidence by sequence similarity to other strains.</li> </ul>                                                                                                                                                                                                                                                                                                                                                                                                                                                                                                                                                                                                                                                                                                                                                                                                         |
| GNWVDF           | <ul style="list-style-type: none"> <li>• The position of the C-terminus of the NS1 protein is mis-annotated. It should be 774..1125 instead of 774..1184. Evidence by sequence similarity to other strains.</li> <li>• The position of the N-terminus of the NS2a protein is mis-annotated. It should be 1126..1343 instead of 1185..1343.</li> </ul>                                                                                                                                                                                                                                                                                                                                                                                                                                                                                                                                                                                                                                                                                                                                                                                                                                                                                                                                                                                                                                                                                                                                                                                                                             |

|  |                                                                                                                                                                                                                                                                                                                                                                                                                                                                                                                        |
|--|------------------------------------------------------------------------------------------------------------------------------------------------------------------------------------------------------------------------------------------------------------------------------------------------------------------------------------------------------------------------------------------------------------------------------------------------------------------------------------------------------------------------|
|  | <p>Evidence by sequence similarity to other strains.</p> <ul style="list-style-type: none"><li>• The position of the C-terminus of the NS4a protein is mis-annotated. It should be 2092..2241 instead of 2092..2374.</li></ul> <p>Evidence by sequence similarity to other strains.</p> <ul style="list-style-type: none"><li>• The position of the N-terminus of the NS4b protein is mis-annotated. It should be 2242..2486 instead of 2375..2486.</li></ul> <p>Evidence by sequence similarity to other strains.</p> |
|--|------------------------------------------------------------------------------------------------------------------------------------------------------------------------------------------------------------------------------------------------------------------------------------------------------------------------------------------------------------------------------------------------------------------------------------------------------------------------------------------------------------------------|

## References

Osatomi K, Sumiyoshi H: **Complete nucleotide sequence of dengue type 3 virus genome RNA**. *Virology* 1990, **176**(2):643-647.

Fu J, Tan BH, Yap EH, Chan YC, Tan YH: **Full-length cDNA sequence of dengue type 1 virus (Singapore strain S275/90)**. *Virology* 1992, **188**(2):953-958.
